# Supplementary material for: Pharmacophore-based discovery of FXR agonists. Part I: Model development and experimental validation
Source: PubMed Central journal article supplement — Bioorg Med Chem. 2011 Dec 1;19(23):7168–80. doi: 10.1016/j.bmc.2011.09.056 (PMC3254253; doi:10.1016/j.bmc.2011.09.056), 2011-12-01
Supplement: mmc1.pdf [file mmc1.pdf]

## Supporting Information Material

# Pharmacophore-based discovery of FXR-agonists. Part I: Model development and experimental validation

*Daniela Schuster<sup>†\*</sup>, Patrick Markt<sup>†</sup>, Ulrike Grienke<sup>‡</sup>, Judit Mihaly-Bison<sup>§</sup>, Markus Binder<sup>§</sup>, Stefan M. Noha<sup>†</sup>, Judith M. Rollinger<sup>‡</sup>, Hermann Stuppner<sup>‡</sup>, Valery N. Bochkov<sup>§</sup>, Gerhard Wolber<sup>†||</sup>*

<sup>†</sup>*Computer-Aided Molecular Design Group, Institute of Pharmacy / Pharmaceutical Chemistry and Center for Molecular Biosciences Innsbruck - CMBI, University of Innsbruck, Innrain 52c, A-6020 Innsbruck, Austria*

<sup>‡</sup>*Institute of Pharmacy / Pharmacognosy and Center for Molecular Biosciences Innsbruck - CMBI, University of Innsbruck, Innrain 52c, A-6020 Innsbruck, Austria*

<sup>§</sup>*Department of Vascular Biology and Thrombosis Research, Center for Biomolecular Medicine and Pharmacology, Medical University of Vienna, Austria*

<sup>||</sup>*Institute of Pharmacy, Department of Pharmaceutical Chemistry, Freie University Berlin, Königin-Luise-Str. 2+4, D-14195 Berlin, Germany*

## Supporting references (FXR ligand sources in the ChEMBL database): <sup>1-16</sup>

1. Kainuma, M.; Makishima, M.; Hashimoto, Y.; Miyachi, H. *Bioorg. Med. Chem.* **2007**, *15*, 2587.
2. Costantino, G.; Macchiarulo, A.; Entrena-Guadix, A.; Camaioni, E.; Pellicciari, R. *Bioorganic & Medicinal Chemistry Letters* **2003**, *13*, 1865.
3. Honorio, K. M.; Garratt, R. C.; Andricopulo, A. D. *Bioorg. Med. Chem. Lett.* **2005**, *15*, 3119.
4. Kainuma, M.; Kasuga, J.-i.; Hosoda, S.; Wakabayashi, K.-i.; Tanatani, A.; Nagasawa, K.; Miyachi, H.; Makishima, M.; Hashimoto, Y. *Bioorg. Med. Chem. Lett.* **2006**, *16*, 3213.
5. Akwabi-Ameyaw, A.; Bass, J. Y.; Caldwell, R. D.; Caravella, J. A.; Chen, L.; Creech, K. L.; Deaton, D. N.; Jones, S. A.; Kaldor, I.; Liu, Y.; Madauss, K. P.; Marr, H. B.; McFadyen, R. B.; Miller, A. B.; Navas III, F.; Parks, D. J.; Spearing, P. K.; Todd, D.; Williams, S. P.; Wisely, G. B. *Bioorg. Med. Chem. Lett.* **2008**, *18*, 4339.
6. Wei, D.; Jiang, X.; Zhou, L.; Chen, J.; Chen, Z.; He, C.; Yang, K.; Liu, Y.; Pei, J.; Lai, L. *J. Med. Chem.* **2008**, *51*, 7882.
7. Feng, S.; Yang, M.; Zhang, Z.; Wang, Z.; Hong, D.; Richter, H.; Benson, G. M.; Bleicher, K.; Grether, U.; Martin, R. E.; Plancher, J.-M.; Kuhn, B.; Rudolph, M. G.; Chen, L. *Bioorg. Med. Chem. Lett.* **2009**, *19*, 2595.
8. Bass, J. Y.; Caldwell, R. D.; Caravella, J. A.; Chen, L.; Creech, K. L.; Deaton, D. N.; Madauss, K. P.; Marr, H. B.; McFadyen, R. B.; Miller, A. B.; Parks, D. J.; Todd, D.; Williams, S. P.; Wisely, G. B. *Bioorg. Med. Chem. Lett.* **2009**, *19*, 2969.
9. Pellicciari, R.; Fiorucci, S.; Camaioni, E.; Clerici, C.; Costantino, G.; Maloney, P. R.; Morelli, A.; Parks, D. J.; Willson, T. M. *J. Med. Chem.* **2002**, *45*, 3569.
10. Pellicciari, R.; Costantino, G.; Camaioni, E.; Sadeghpour, B. M.; Entrena, A.; Willson, T. M.; Fiorucci, S.; Clerici, C.; Gioiello, A. *J. Med. Chem.* **2004**, *47*, 4559.
11. Pellicciari, R.; Costantino, G.; Fiorucci, S. *J. Med. Chem.* **2005**, *48*, 5383.
12. Nicolaou, K. C. *J. Med. Chem.* **2005**, *48*, 5613.
13. Pellicciari, R.; Gioiello, A.; Costantino, G.; Sadeghpour, B. M.; Rizzo, G.; Meyer, U.; Parks, D. J.; Entrena-Guadix, A.; Fiorucci, S. *J. Med. Chem.* **2006**, *49*, 4208.
14. Pellicciari, R.; Sato, H.; Gioiello, A.; Costantino, G.; Macchiarulo, A.; Sadeghpour, B. M.; Giorgi, G.; Schoonjans, K.; Auwerx, J. *J. Med. Chem.* **2007**, *50*, 4265.
15. Sato, H.; Macchiarulo, A.; Thomas, C.; Gioiello, A.; Une, M.; Hofmann, A. F.; Saladin, R.; Schoonjans, K.; Pellicciari, R.; Auwerx, J. *J. Med. Chem.* **2008**, *51*, 1831.
16. Flatt, B.; Martin, R.; Wang, T.-L.; Mahaney, P.; Murphy, B.; Gu, X.-H.; Foster, P.; Li, J.; Pircher, P.; Petrowski, M.; Schulman, I.; Westin, S.; Wrobel, J.; Yan, G.; Bischoff, E.; Daige, C.; Mohan, R. *J. Med. Chem.* **2009**, *52*, 904.

**Chart S-1.** FXR ligands from recent literature used for theoretical model validation.

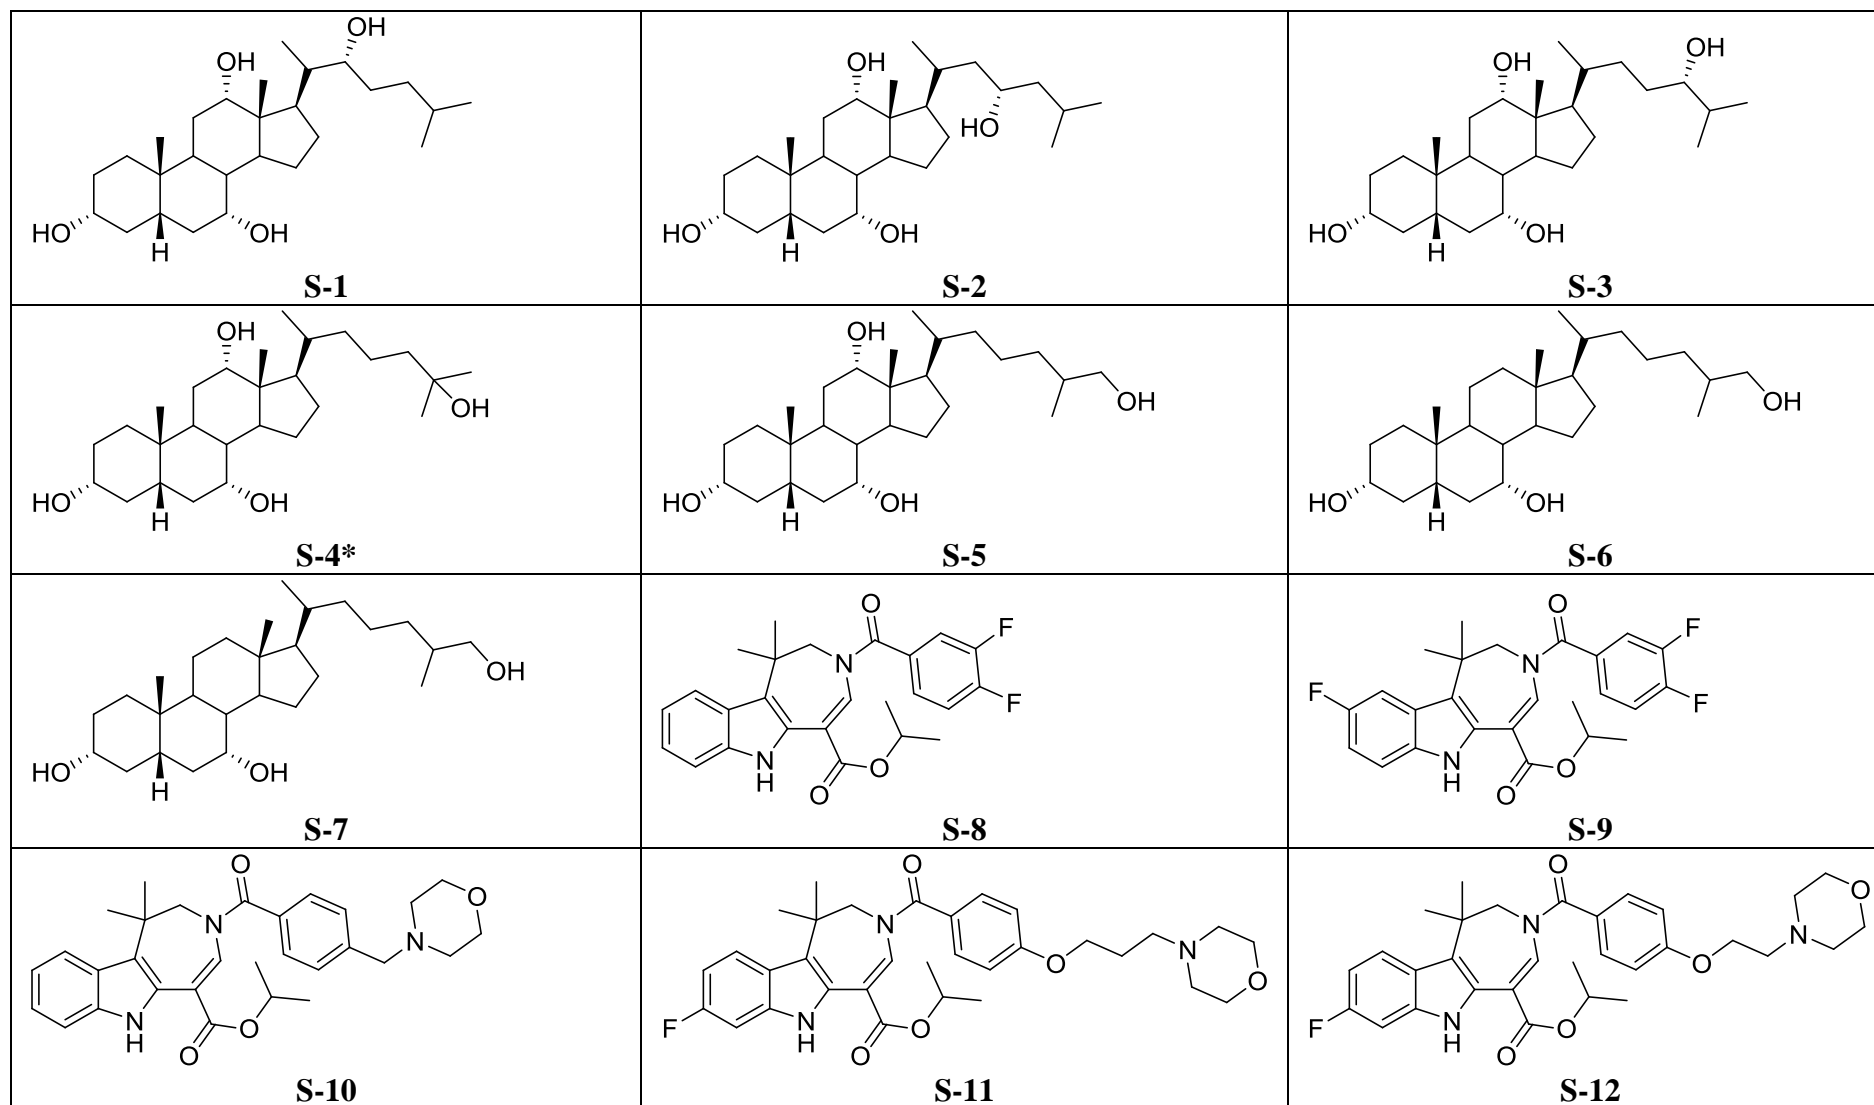

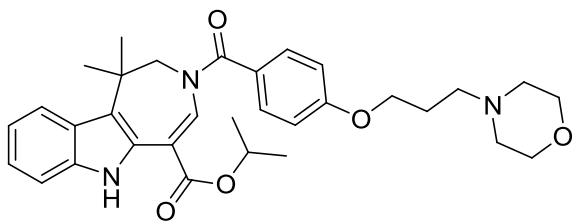

**S-13**

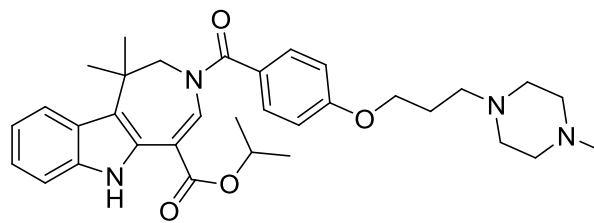

**S-14**

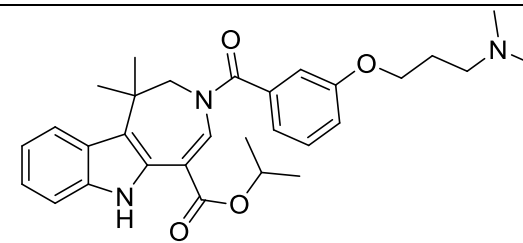

**S-15**

\* **S-4** was not recognized by the FXR pharmacophore model collection.
